# Supplementary material for: Irrigation with Magnetized Water Alleviates the Harmful Effect of Saline–Alkaline Stress on Rice Seedlings
Source: MDPI journal article supplement (doi:10.3390/ijms231710048), 2022-09-02
Supplement: s1 [file s1]

Table S1. Primers used for quantitative real-time PCR in this study

| <b>Gene</b>     | <b>Forward primer 5' → 3'</b> | <b>Reverse primer 5' → 3'</b> |
|-----------------|-------------------------------|-------------------------------|
| <i>OsNRT1;1</i> | GGGCAGAGTTCAGCAATCG           | GGAAGGACGCCGCAGGT             |
| <i>OsNRT1;2</i> | GCGGCGAGTCCCTGAG              | CGACGGCGTAGATGAATGA           |
| <i>OsNRT2;1</i> | ACGGCACAAAGTACAAGACG          | CCACTGCGGGAAGTAGATG           |
| <i>OsAMT1;1</i> | GCCTCCAACAGCAACAACC           | CCAAACAGAACTGGCAATCA          |
| <i>OsAMT1;2</i> | CACGGTGGCGATGAAAGG            | TTGGAGATGGTGGTGAAGGAC         |
| <i>OsAMT1;3</i> | TCAAGCAGGTCCCACAGG            | TGAGGAAGGCGGAGTAGATG          |
| <i>OsAMT2;1</i> | GATGAATCACGCCGAAACAC          | GCACGGACGAATCGCTACTT          |
| <i>OsAMT2;2</i> | CGACCAAGGACAGGGAGA            | CACGGCGAGCGAGGAG              |
| <i>OsAMT2;3</i> | GTTCACCCCGCTCTGGC             | CCGCTCCCTGTCGCTCTT            |
| <i>OsAMT3;1</i> | CCAAGTCTGAAAAGTGAAAACG        | TGCTTCGCATACGGCTGAC           |
| <i>OsAMT3;2</i> | CCCAGTTCGGCAAGCAG             | TGGCGAGGCAGATGAGG             |
| <i>OsAMT3;3</i> | GAGATTCCCGCCCAACAA            | TCCACCCAAGCCACAGC             |
| <i>Actin</i>    | ACCACAGGTATTGTGTTGGACTC       | AGAGCATATCCTTCATAGATGGG       |
